# Supplementary material for: Achieving realistic gastric emptying curve in an advanced dynamic in vitro human digestion system: experiences with cheese—a difficult to empty material
Source: Royal Society of Chemistry journal article supplement (doi:10.1039/d0fo03364b), 2021-01-01
Supplement: d0fo03364b1.pdf [file d0fo03364b1.pdf]

1  
2  
3  
4  
5  
6  
7  
8  
9  
10  
11  
12  
13  
14  
15  
16  
17  
18  
19  
20  
21  
22  
23

## Supporting Material

for

### Achieving realistic gastric emptying curve in an advanced dynamic *in vitro* human digestion system: experiences with cheese - a difficult to empty material

Zhen Peng,<sup>a, b</sup> Peng Wu,<sup>\*b</sup> Jingjing Wang,<sup>c</sup> Didier Dupont,<sup>d</sup> Oliva Menard,<sup>d</sup> Romain  
Jeantet,<sup>d</sup> and Xiao Dong Chen<sup>\*a, b</sup>

<sup>a</sup> *Department of Chemical Engineering and Biochemical Engineering, College of  
Chemistry and Chemical Engineering, Xiamen University, Xiamen 361005, China*

<sup>b</sup> *School of Chemical and Environmental Engineering, College of Chemistry, Chemical  
Engineering and Material Science, Soochow University, Suzhou 215123, Jiangsu  
Province, China*

<sup>c</sup> *Xiao Dong Pro-health (Suzhou) Instrumentation Co Ltd, Suzhou 215152, Jiangsu  
Province, China*

<sup>d</sup> *STLO, UMR 1253, INRA, Agrocampus Ouest, 35000 Rennes, France*

#### \* Corresponding authors

Assistant Professor Peng Wu, Email: [p.wu@suda.edu.cn](mailto:p.wu@suda.edu.cn)

Professor Xiao Dong Chen, Email: [xdchen@mail.suda.edu.cn](mailto:xdchen@mail.suda.edu.cn)

**Tel:** +86-512-65882767; **Fax:** +86-512-65882750

## 24 **Preparation of simulated digestive fluids**

25 In brief, the stock solutions of various salts including KCl (0.5 mol/L), KH<sub>2</sub>PO<sub>4</sub> (0.5  
26 mol/L), NaHCO<sub>3</sub> (1 mol/L), NaCl (2 mol/L), MgCl<sub>2</sub>(H<sub>2</sub>O)<sub>6</sub> (0.15 mol/L) and  
27 (NH<sub>4</sub>)<sub>2</sub>CO<sub>3</sub> (0.5 mol/L) were prepared in advance. The SSF was prepared by dissolving  
28  $\alpha$ -amylase in the SSF stock electrolyte solution, followed by adding 0.3 M CaCl<sub>2</sub> and  
29 deionized water to achieve 150 U/mL  $\alpha$ -amylase. The pH of SSF was adjusted to 7.0  
30 using 1 mol/L NaOH. Similarly, pepsin was dissolved in the SGF stock solution, and  
31 0.3 M CaCl<sub>2</sub> and deionized water were added to achieve 4000 U/mL pepsin in the final  
32 SGF with pH of 1.6 adjusted using 6 mol/L HCl.

33

## 34 **Discussions on the physiological relevance of the inclination of the** 35 **stomach system**

36 In terms of the tilting of the stomach system, it may be physiologically relevant to the  
37 modification of gastric emptying rate induced by posture <sup>1</sup>, which provides an in vitro  
38 way to investigate the effect of posture on gastric emptying. Moreover, it is likely that  
39 the relative position of the stomach in humans would change in relation to the volume  
40 of gastric contents remaining in the stomach during digestion. It has been reported that  
41 the normal capacity of the human stomach varies from less than 0.25 L in the fasting  
42 state, and it can expand up to 1.7 L after intake of a big meal <sup>2</sup>. Although the human  
43 stomach is generally characterized as a J-shaped organ, its geometry and size can be  
44 significantly influenced by the position of the body, the condition of surrounding  
45 viscera and organs, the amount and type of meal ingested, and the digestion time <sup>2</sup>. Due  
46 to the effect of gravity and the gastric accommodation to food intake, the fasting  
47 stomach with a fist-like morphology seems to be almost at a vertical position ( $T = t_1$ );  
48 however, the stomach may tilt towards a more horizontal position when it is full of meal  
49 ( $T = t_3$ ). With the continuous reduction of gastric volume due to gastric emptying, the  
50 expanded stomach may recover back to the approximately vertical position ( $T = t_5$ ).  
51 The evolutions of the position, size and morphology of the human stomach during food  
52 intake and gastric emptying are schematically illustrated in Fig. S1 below. We think

53 this is a reasonable speculation in terms of the unique morphology and anatomy of the  
54 human stomach, although direct in vivo evidences have not been found. On this basis,  
55 it is reasonable to claim that the inclination of stomach system as shown in this study  
56 is physiologically relevant to that occurring in vivo.

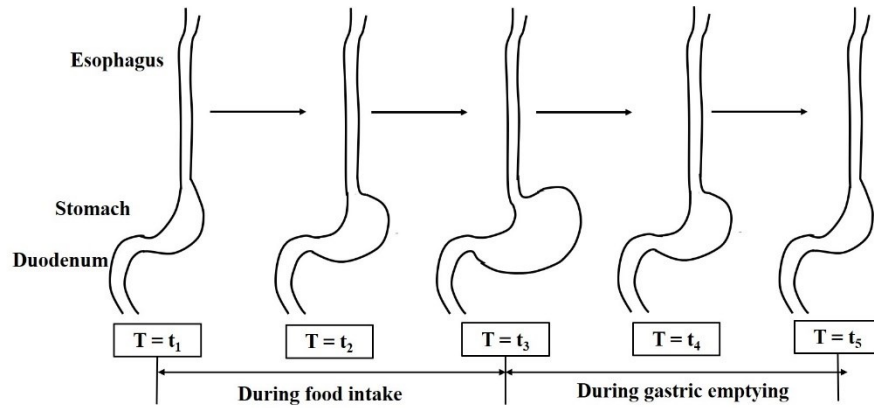

57

58 **Fig. S1.** Schematic diagram illustrating the evolutions of the position, size and  
59 morphology of the human stomach during food intake and gastric emptying

60

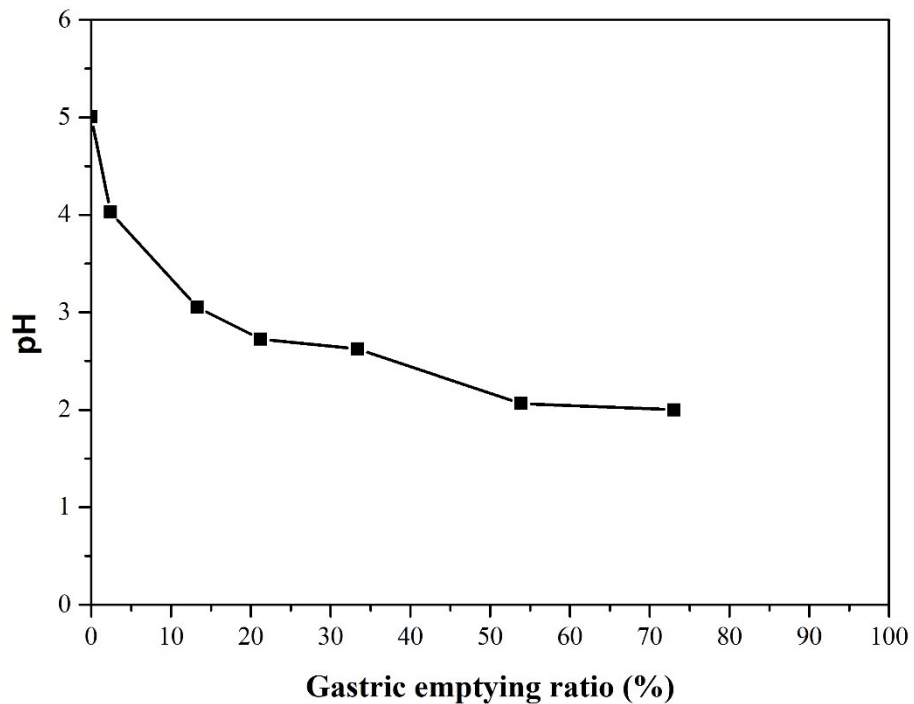

61

62 **Fig. S2.** Changes in the gastric pH as a function of gastric emptying ratio (%).

63

64

65

## 66 **References**

- 67 1. S. Doran, K. L. Jones, J. M. Andrews and M. Horowitz, Effects of meal volume  
68 and posture on gastric emptying of solids and appetite, *American Journal of*  
69 *Physiology-Regulatory, Integrative and Comparative Physiology*, 1998, **275**,  
70 R1712-R1718.
- 71 2. M. J. Ferrua and R. P. Singh, Modeling the fluid dynamics in a human stomach  
72 to gain insight of food digestion, *Journal of Food Science*, 2010, **75**, R151-  
73 R162.
- 74
